# Supplementary material
Source: publisher figshare collection journal article supplement (https://acs.figshare.com/ndownloader/files/5760414)

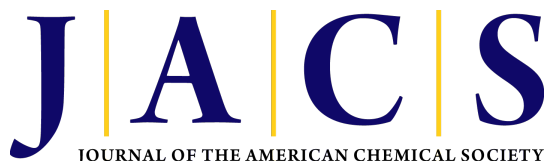

J | A | C | S  
JOURNAL OF THE AMERICAN CHEMICAL SOCIETY

J. Am. Chem. Soc., 1998, 120(42), 10978-10979, DOI: [10.1021/ja9814220](https://doi.org/10.1021/ja9814220)

#### Terms & Conditions

Electronic Supporting Information files are available without a subscription to ACS Web Editions. The American Chemical Society holds a copyright ownership interest in any copyrightable Supporting Information. Files available from the ACS website may be downloaded for personal use only. Users are not otherwise permitted to reproduce, republish, redistribute, or sell any Supporting Information from the ACS website, either in whole or in part, in either machine-readable form or any other form without permission from the American Chemical Society. For permission to reproduce, republish and redistribute this material, requesters must process their own requests via the RightsLink permission system. Information about how to use the RightsLink permission system can be found at <http://pubs.acs.org/page/copyright/permissions.html>

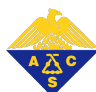

ACS Publications

MOST TRUSTED. MOST CITED. MOST READ.

Copyright © 1998 American Chemical Society

## Supplementary Material for the Microfilm Edition

**Figure 1s** : Simulations of the frozen aqueous solution X-band EPR spectrum of  $\text{VO}^{2+}$ -IGPD in the non-derivative form, as shown in the inset of Fig.1, deconvoluted for the three identified sub-spectra.

**Figure 2s** : Powder ESEEM simulations of the high-frequency  $^{14}\text{N}$  features in the Fourier-transform spectra of  $\text{VO}^{2+}$ -IGPD simulated at  $T = 4.2$  K with the hfi and nqi parameters for the vanadyl g- and hf-parameters of VO-IGPD used in the present work but for the Euler angles of the  $^{14}\text{N}$  interaction parameters as reported for D-xylose isomerase (Dikanov et al., 1995).

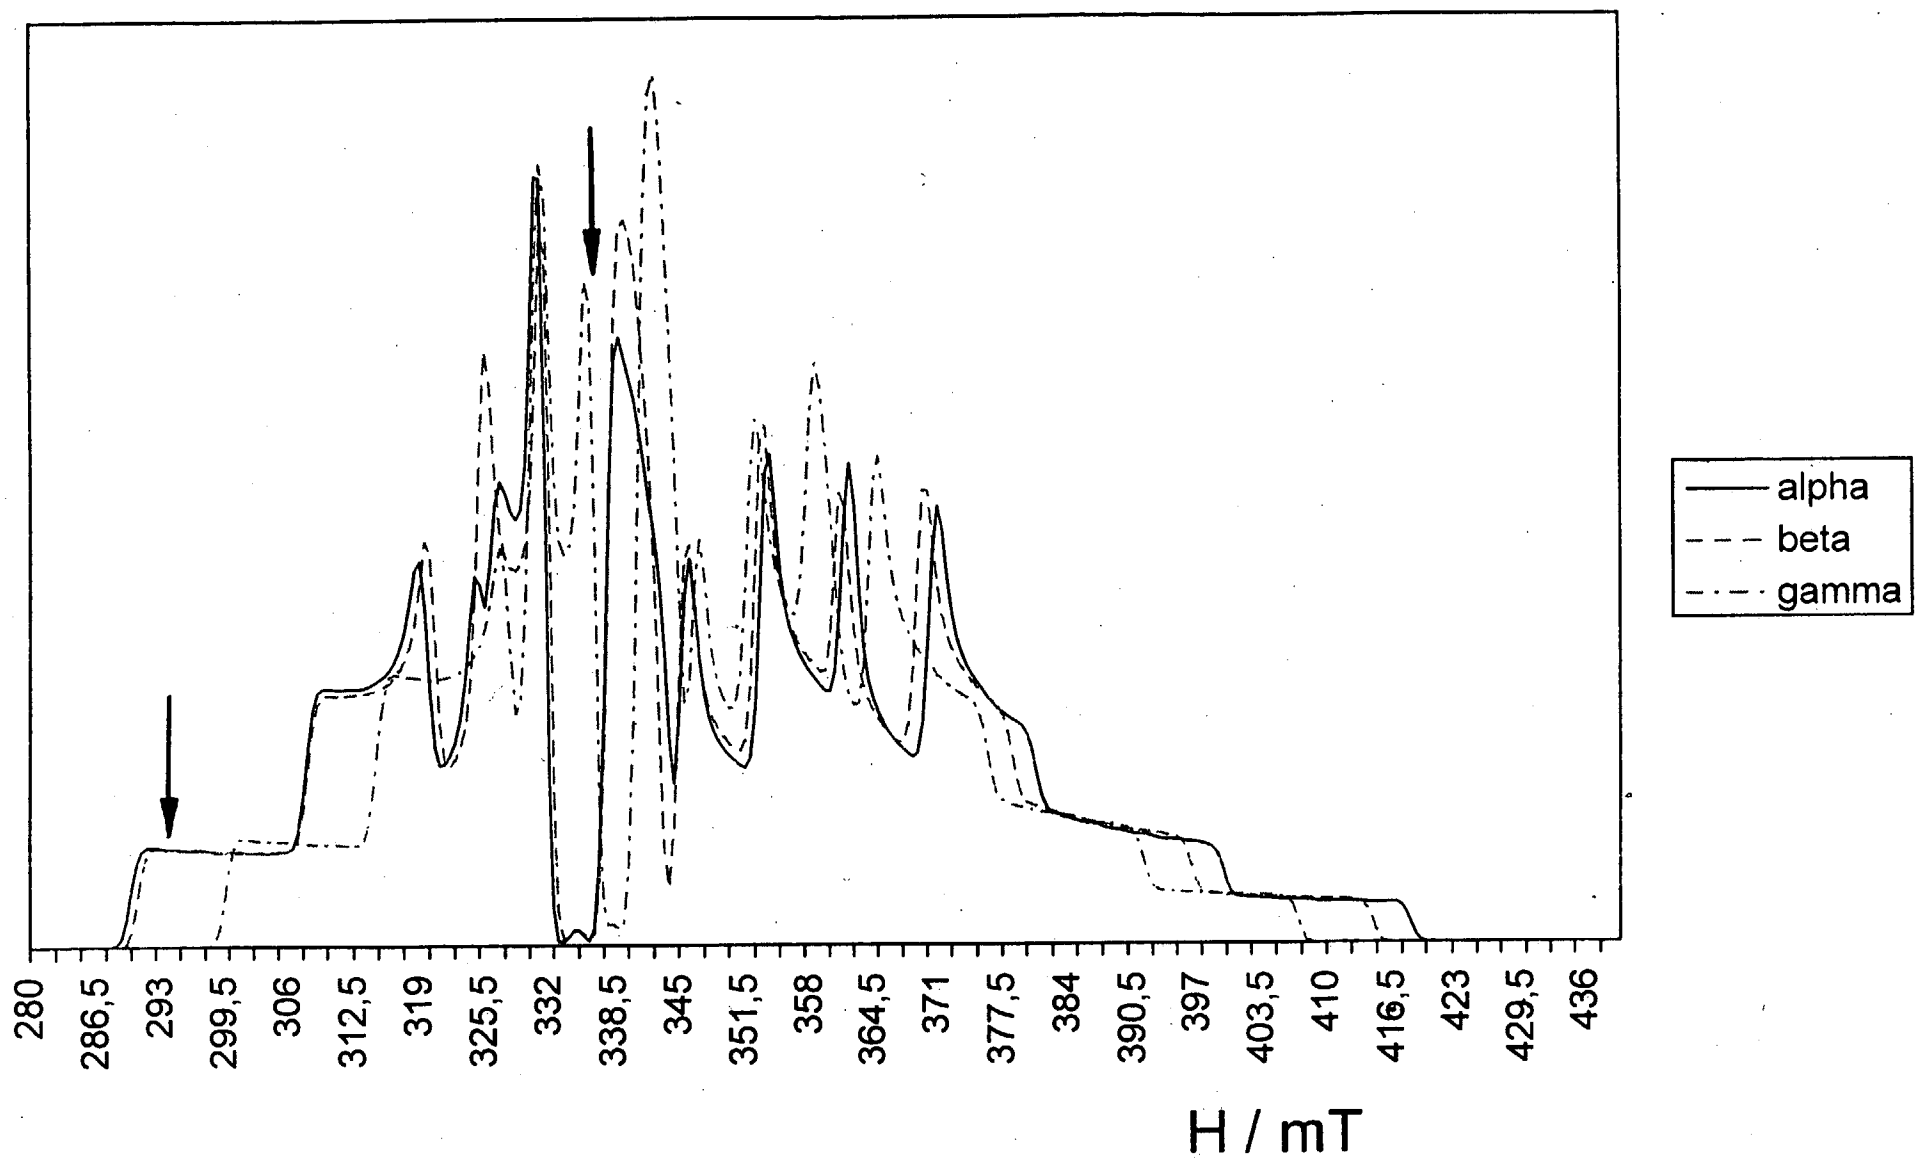

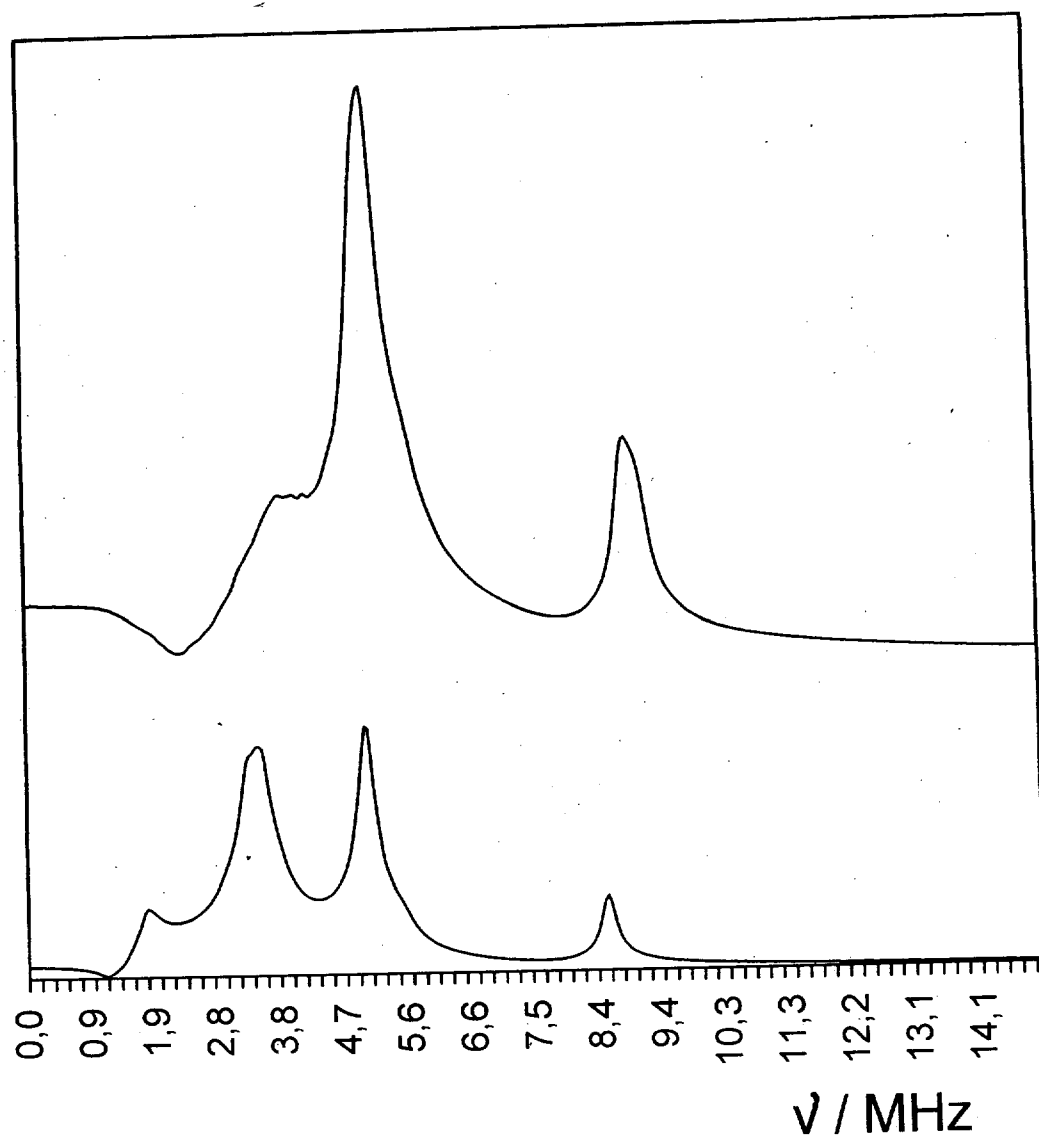

Supplement: Supplementary file 1 [file 5760414]
